# Supplementary figures and images for: Rational design and construction of the first tetrahedral net with photoluminescent Cu4I4 cubane cluster as the tetrahedral node
Source: Royal Society of Chemistry journal article supplement (doi:10.1039/b500015g), 2005-01-01

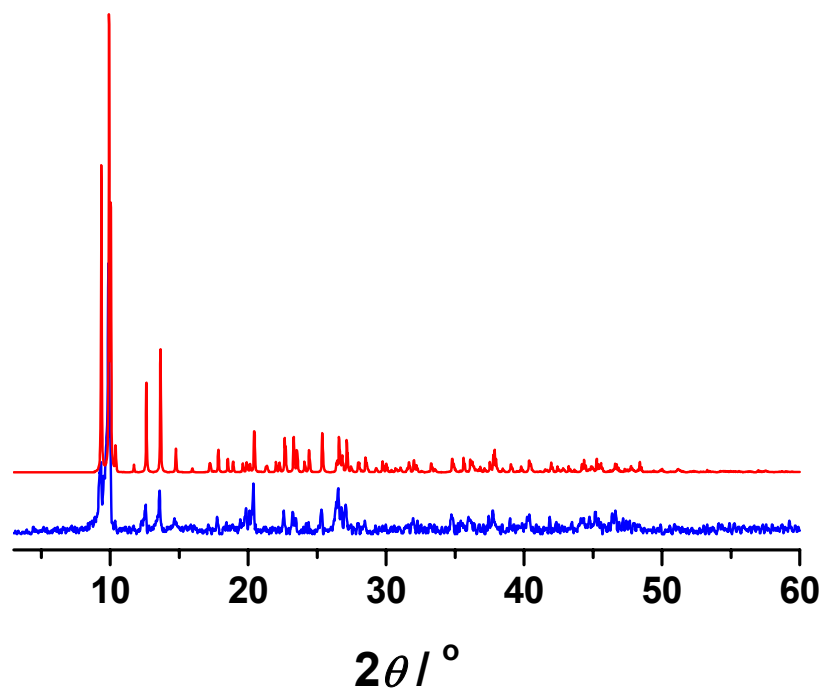

**Figure S1** Simulated and experimental XRPD data of **2**.

Supplement: b500015g.pdf [file b500015g.pdf]
